# Supplementary material for: Unlocking room-temperature bistable spin transition at the nanoscale: the synthesis of core@shell [Fe(NH2trz)3(NO3)2]@SiO2 nanoparticles
Source: Royal Society of Chemistry journal article supplement (doi:10.1039/d4dt00911h), 2024-01-01
Supplement: d4dt00911h1.pdf [file d4dt00911h1.pdf]

**Unlocking Room-Temperature Bistable Spin Transition at the Nanoscale: Synthesis of Core@Shell  
[Fe(NH<sub>2</sub>Trz)<sub>3</sub>(NO<sub>3</sub>)<sub>2</sub>]@SiO<sub>2</sub> Nanoparticles**

**A. Regueiro,<sup>1</sup> M. Carrascosa,<sup>1,2</sup> R. Torres-Cavanillas,<sup>1,3\*</sup> E. Coronado<sup>1\*</sup>**

1. Instituto de Ciencia Molecular, Universitat de València, Catedrático José Beltrán 2, 46980, Paterna, Spain
2. Universitat Politècnica de Valencia, Nanophotonics Technology Center, Valencia, Spain
3. Department of Materials, Oxford University, 21 Banbury Rd, Oxford OX2 6NN, United Kingdom

\*Corresponding authors: Eugenio.Coronado@uv.es, ramon.torres@uv.es

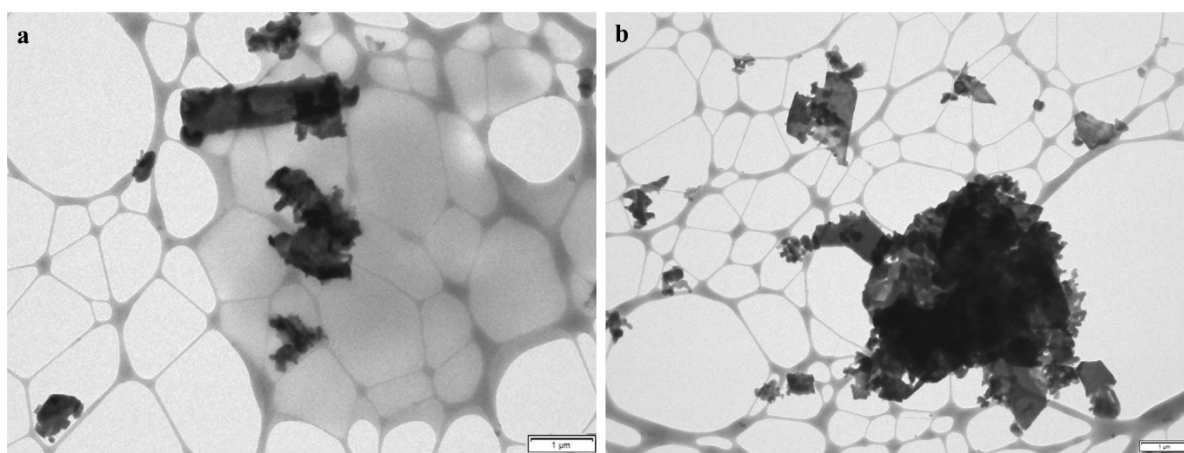

Figure S1. TEM images of two areas of sample SCO-bulk.

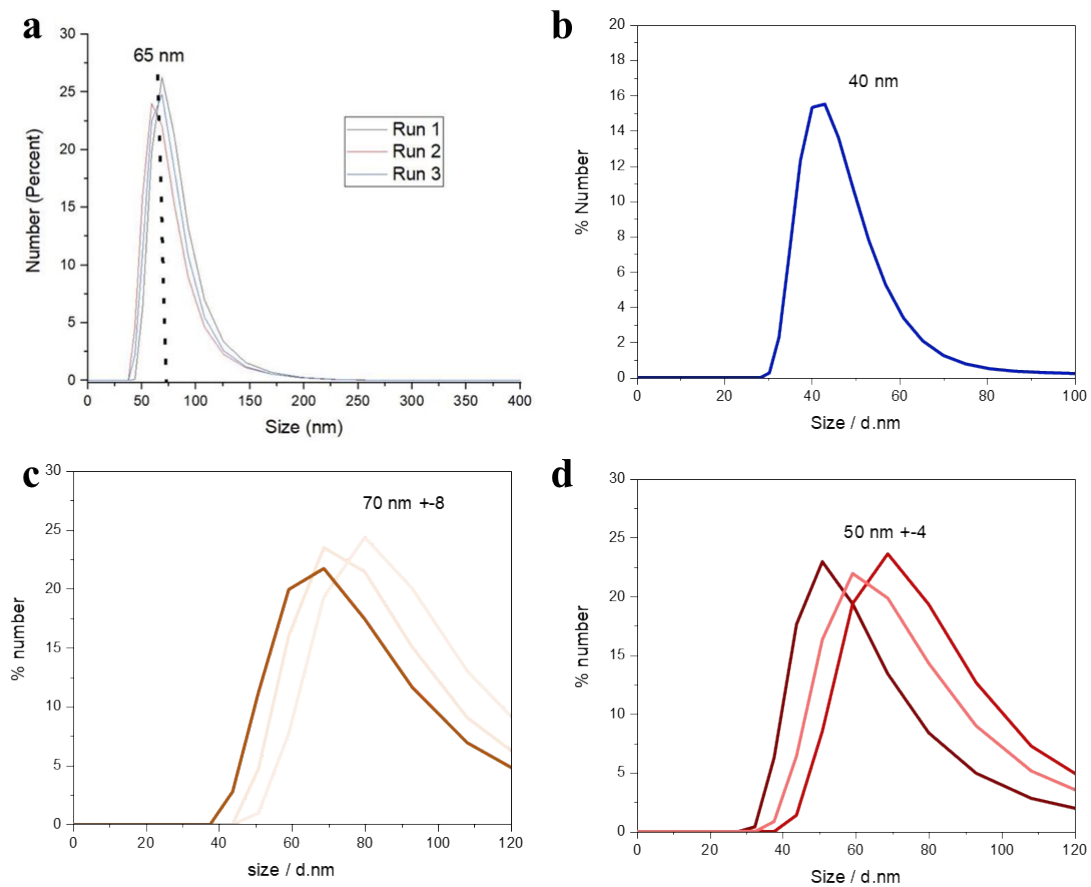

Figure S2. DLS measurements of SCO-1 (a), SCO-2 (b), SCO-SiO<sub>2</sub>-1 (c), and SCO-SiO<sub>2</sub>-2 (d).

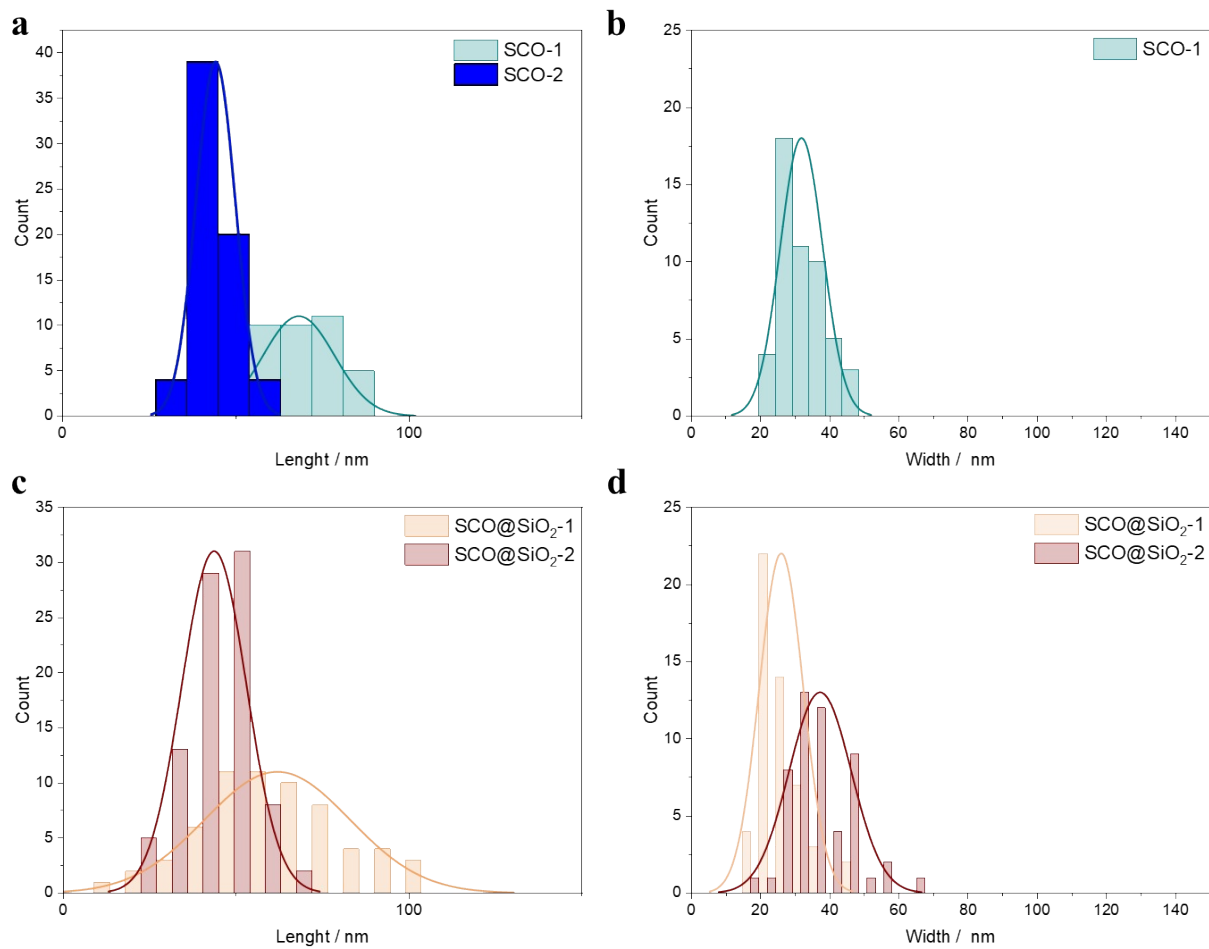

Figure S3. The plot of the length and width size extracted from manual counting from SEM or TEM images. Length of SCO-1 to 2 (a) and width (b), of SCO-SiO<sub>2</sub>-1 to 2 lengths (c) and width (d).

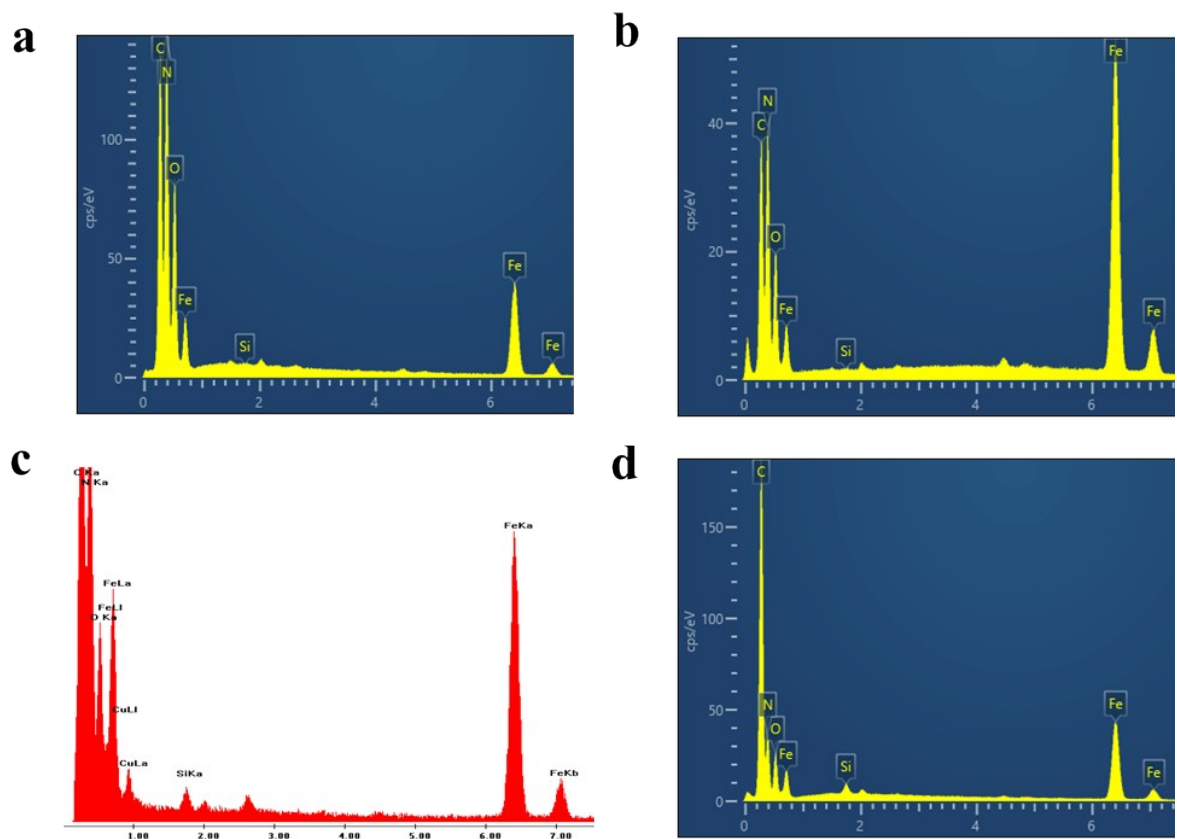

Figure S4. EDX signal of SCO-1 (a), SCO-2 (b), and SCO@SiO<sub>2</sub>-1 (c), and SCO@SiO<sub>2</sub>-2 (d)

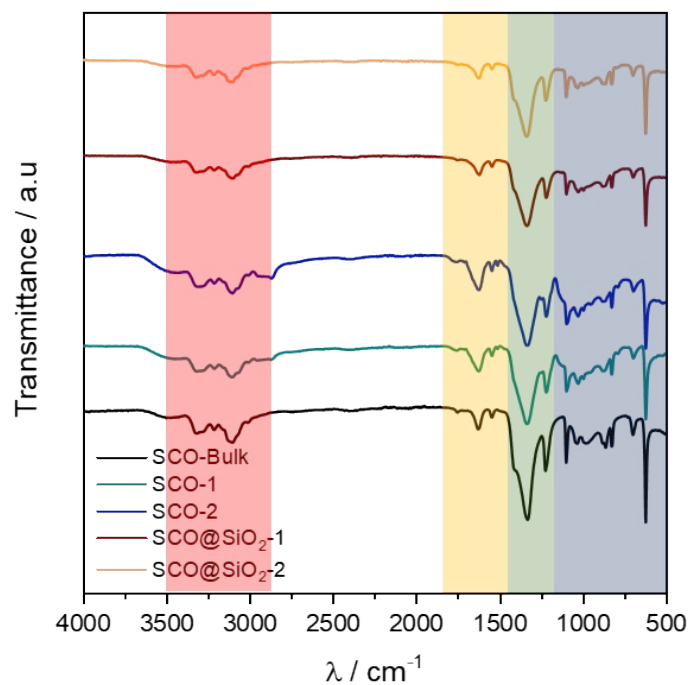

Figure S5. ATR-IR spectra of SCO-Bulk (black), SCO-1 (dark blue), SCO-2 (olive green), and SCO@SiO<sub>2</sub>-1 (burgundy red), and SCO@SiO<sub>2</sub>-2 (orange).

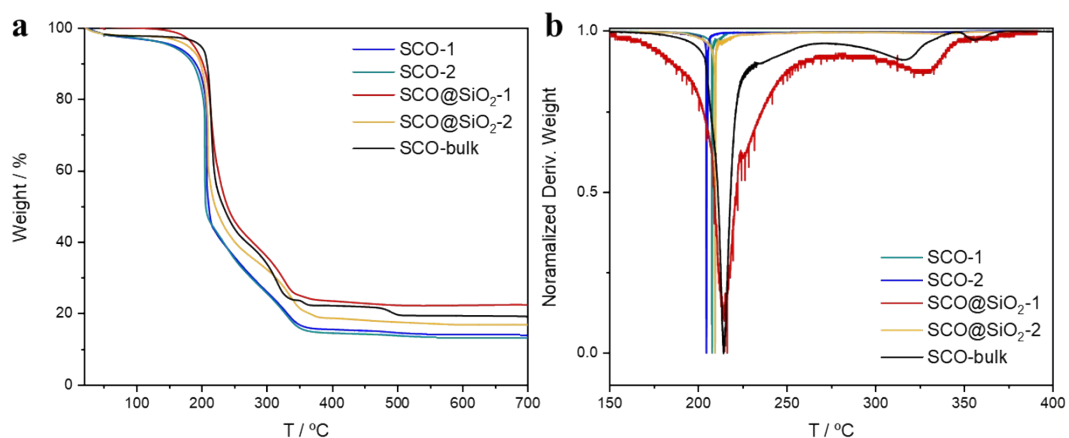

Figure S6. (a) Thermo gravimetric analysis of SCO-bulk (Black), SCO-1 (dark blue), SCO-2 (olive green), and SCO@SiO<sub>2</sub>-1 (burgundy red), and SCO@SiO<sub>2</sub>-2 (orange).(b) Normalized Derivative of the different TGA plots

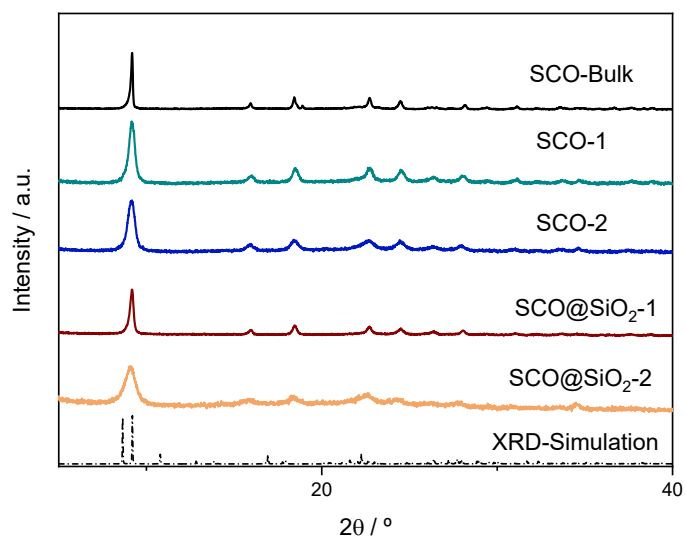

Figure S7. XRD spectra of SCO-bulk (black), SCO-1 (dark blue), SCO-2 (cyan), and SCO@SiO<sub>2</sub>-2 (burgundy red), SCO@SiO<sub>2</sub>-2 (orange), and simulated pattern dashed line.

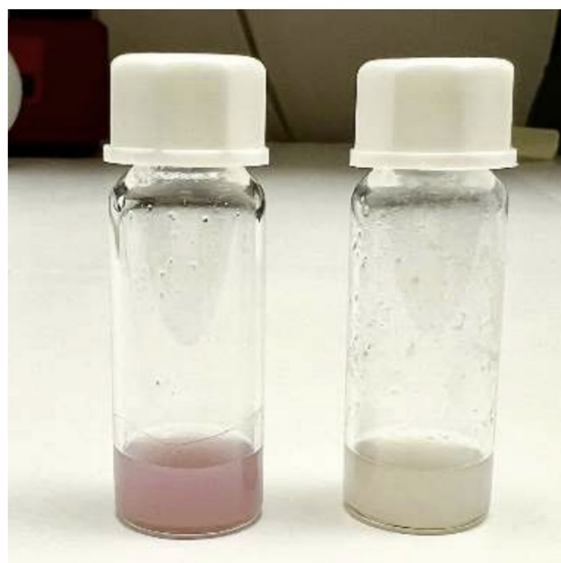

Figure S8. SCO@SiO<sub>2</sub>-1 freshly redispersed in EtOH (pink solution), and after heated to 60°C, and cool down to room temperature (white solution).

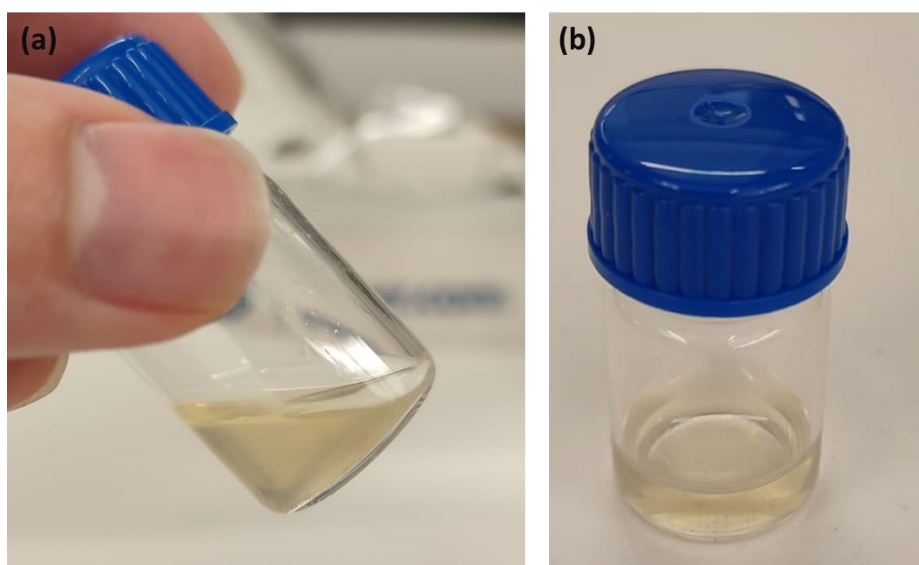

Figure S9. SCO-1(a) and 2 (b) redispersed in H<sub>2</sub>O.

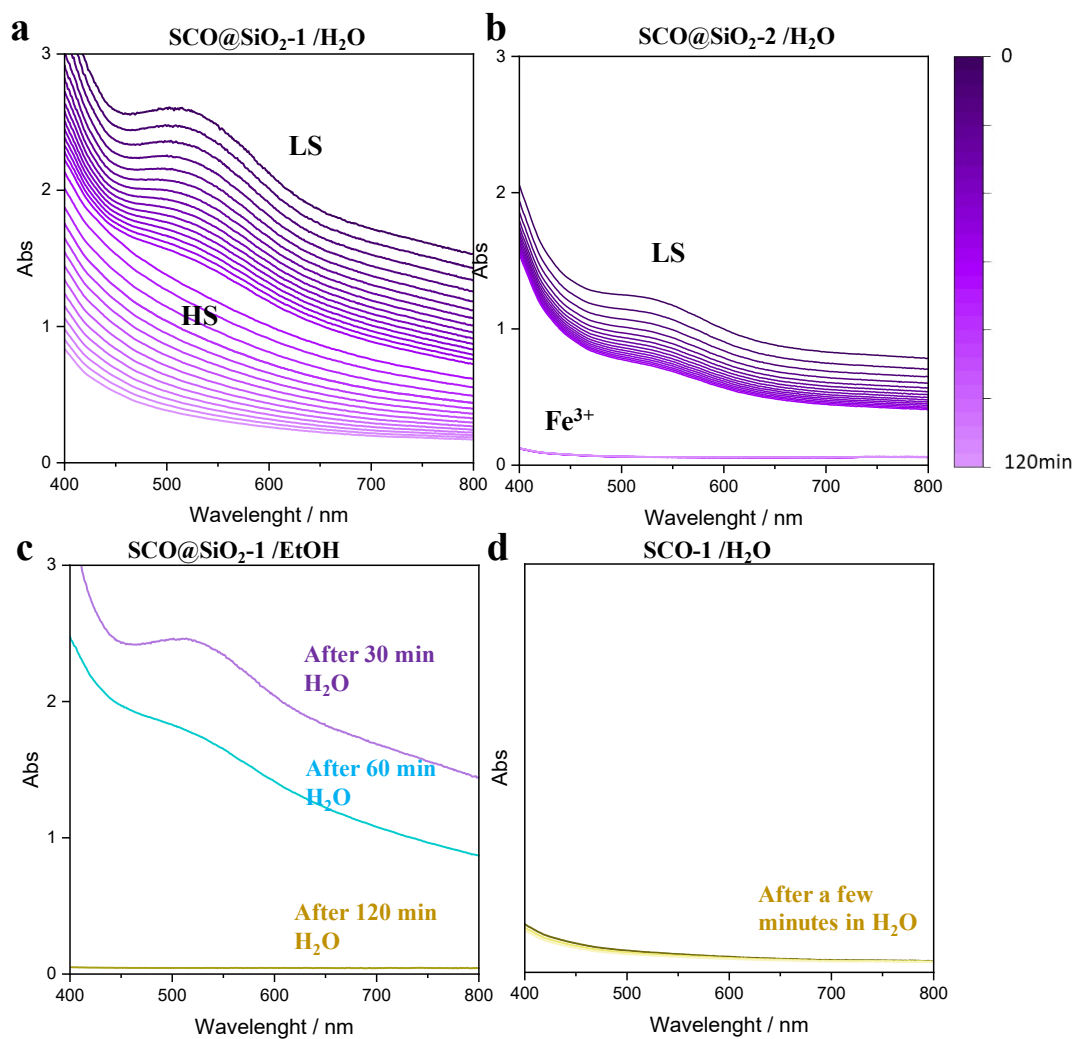

Figure S10. a) Dependency of the UV-VIS absorbance of SCO@SiO<sub>2</sub>-1 redispersed in water as a function of the time. (b) Dependency of the UV-vis absorbance as a function of the time of SCO@SiO<sub>2</sub>-2. The different measurements in the plot were carried out with a 2.5 min delay. (c) UV-vis spectra of SCO@SiO<sub>2</sub>-1 redispersed in EtOH, after 30 min in water (purple), 60 min (cyan), 120 min (dark yellow). (d) UV vis spectra of SCO-1 freshly redispersed in water.

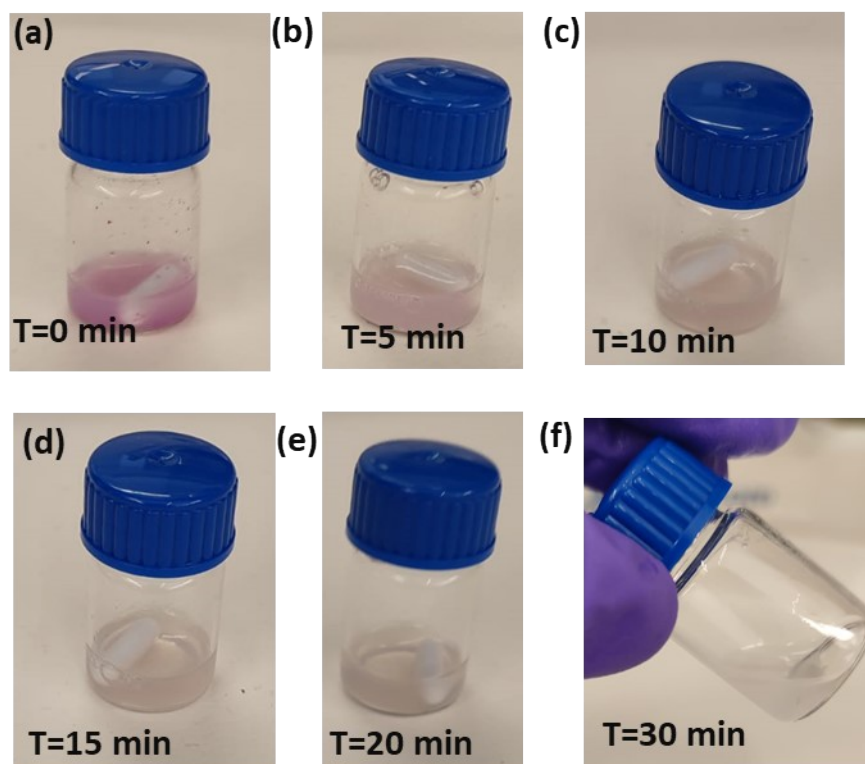

Figure S11. SCO@SiO<sub>2</sub>-1 redispersed in H<sub>2</sub>O at different times after the redispersion.

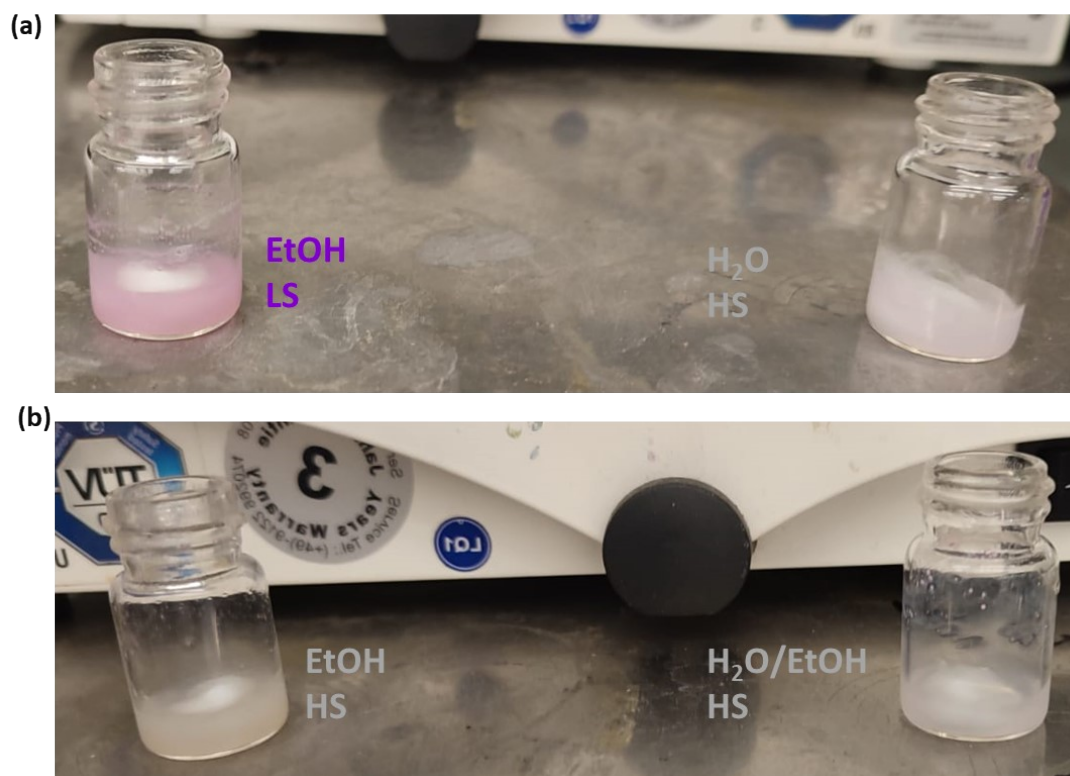

Figure S12. (a) Comparison of SCO@SiO<sub>2</sub>-1 redispersed in EtOH (left) and H<sub>2</sub>O (right) after 15 min. (b) Comparison of the same SCO@SiO<sub>2</sub>-1 presented in (a) after being heated at 60°C, left. At right, we show the SCO@SiO<sub>2</sub>-1 redispersed in water (b) after being centrifuged, and the solid resuspended in EtOH.



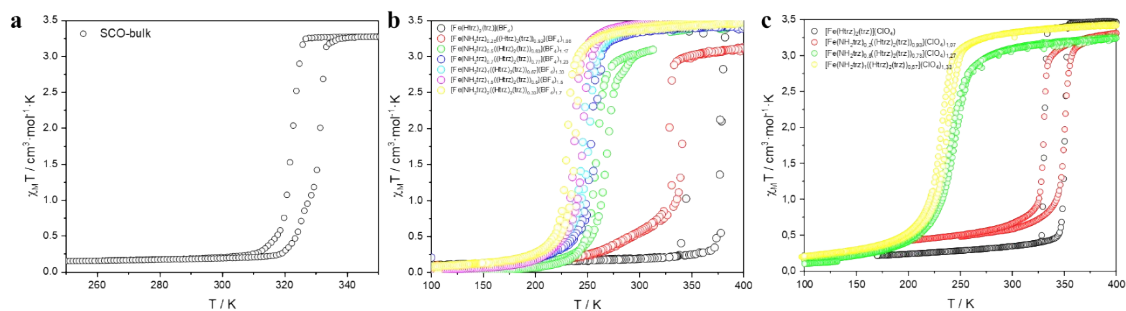

Figure S13. thermal variation of the  $\chi_M T$  product for the SCO-Bulk (a) and different SCO based on  $[\text{Fe}(\text{NH}_2\text{trz})_{3x}((\text{Htrz})_2(\text{trz}))_{1-x}](\text{BF}_4)_{1+x}$  (b), and  $[\text{Fe}(\text{NH}_2\text{trz})_{3x}((\text{Htrz})_2(\text{trz}))_{1-x}](\text{ClO}_4)_{1+x}$  (c).

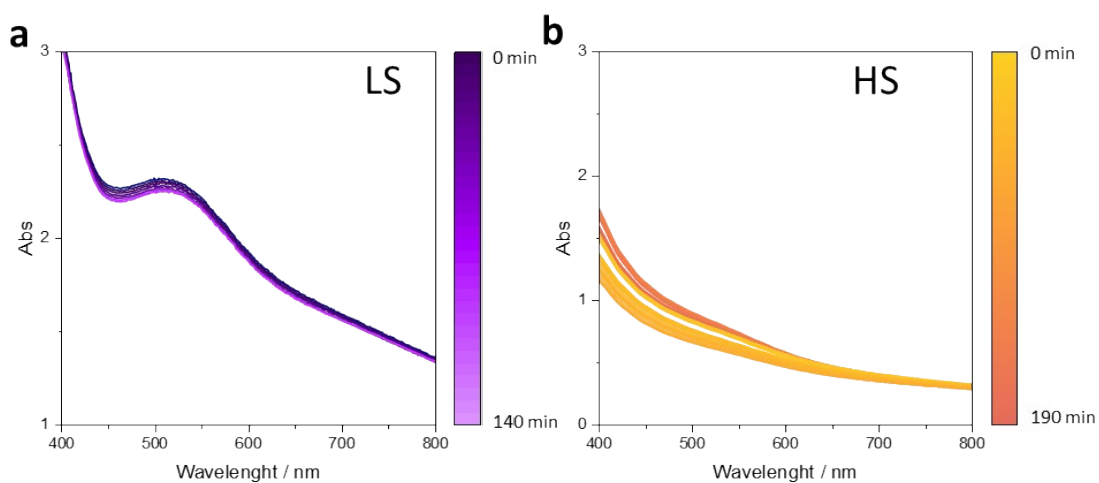

Figure S14. UV vis spectra of SCO@SiO<sub>2</sub>-1 redispersed in EtOH(a), and after heated to 60°C, and cooled down to room temperature (b). The different measurements in the plot were carried out with a 20 minutes delay for (a) and 5-minute for (b).
